# Supplementary material for: Ultra-low cost supercapacitors from coal char: effect of electrolyte on double layer capacitance
Source: Royal Society of Chemistry journal article supplement (doi:10.1039/d3ya00064h), 2023-01-01
Supplement: d3ya00064h1.pdf [file d3ya00064h1.pdf]

## Supporting Information

# Ultra-Low Cost Supercapacitors from Coal Char: Effect of Electrolyte on Double Layer Capacitance

*Zahra Karimi<sup>a</sup>, Jaron Moon<sup>a</sup>, Joshua Malzahn<sup>b</sup>, Eric Eddings<sup>b</sup>, and Roseanne Warren<sup>a\*</sup>*

<sup>a</sup> Department of Mechanical Engineering, University of Utah

1495 E 100 S, 1550 MEK

Salt Lake City, Utah, 84112, USA.

\* [roseanne.warren@utah.edu](mailto:roseanne.warren@utah.edu)

<sup>b</sup> Department of Chemical Engineering, University of Utah

50 S. Central Campus Dr, 3290 MEB

Salt Lake City, UT 84112, USA.

**Table S1.** Literature reports of coal char and carbon-based supercapacitors employing comparable electrolyte concentrations as those used in this work (WIS = water-in-salt; IL = ionic liquid).

|         | Electrolyte                     | Concentration (this work) | Comparable Literature References                                                                                                                                                                                |
|---------|---------------------------------|---------------------------|-----------------------------------------------------------------------------------------------------------------------------------------------------------------------------------------------------------------|
| Aqueous | H <sub>2</sub> SO <sub>4</sub>  | 0.5 M                     | Madhusree <i>et al.</i> <sup>1</sup> (0.5 M)                                                                                                                                                                    |
|         | KOH                             | 6 M                       | Benoy <i>et al.</i> <sup>2</sup> (6 M)<br>Zou <i>et al.</i> <sup>3</sup> (6 M)<br>Yaglikci <i>et al.</i> <sup>4</sup> (6 M)<br>Bora <i>et al.</i> <sup>5</sup> (6 M)<br>Bichat <i>et al.</i> <sup>6</sup> (6 M) |
|         | Na <sub>2</sub> SO <sub>4</sub> | 0.5 M                     | Bichat <i>et al.</i> <sup>6</sup> (0.5 M)                                                                                                                                                                       |
|         | LiNO <sub>3</sub>               | 4 M                       | Jiang <i>et al.</i> <sup>7</sup> (4 M)                                                                                                                                                                          |
| WIS     | NaClO <sub>4</sub>              | 13 m                      | Bu <i>et al.</i> <sup>8</sup> (10 m, 17 m)<br>Gharouel and Béguin <sup>9</sup> (10 m, 17 m)                                                                                                                     |
| IL      | BMIM BF <sub>4</sub> /AN        | 1:1 wt%                   | Kim <i>et al.</i> <sup>10</sup> (1:1 wt%)                                                                                                                                                                       |

**Table S2.** Ultimate analysis of raw Sufco coal (weight % of total sample).

| Component        | Weight % |
|------------------|----------|
| C                | 63.14    |
| Ash              | 12.76    |
| O                | 11.63    |
| H <sub>2</sub> O | 6.53     |
| H                | 4.36     |
| N                | 1.13     |
| S                | 0.45     |

**Table S3.** Ultimate analysis of Sufco coal ash (weight % of ash).

| Ash component                  | Weight % |
|--------------------------------|----------|
| SiO <sub>2</sub>               | 54.07    |
| CaO                            | 15.25    |
| Al <sub>2</sub> O <sub>3</sub> | 11.03    |
| SO <sub>3</sub>                | 6.35     |
| TiO <sub>2</sub>               | 4.17     |
| Fe <sub>2</sub> O <sub>3</sub> | 4.17     |
| MgO                            | 3.99     |
| Other                          | 0.97     |

**Table S4.** Average EDS measurements of coal char (elemental weight % and atomic %).

| Element              | Weight % | Atomic % |
|----------------------|----------|----------|
| C K                  | 75.0     | 86.0     |
| O K                  | 12.0     | 10.1     |
| Si K                 | 4.0      | 1.9      |
| Ca K                 | 3.0      | 1.0      |
| Other trace elements | 4.9      | 0.8      |

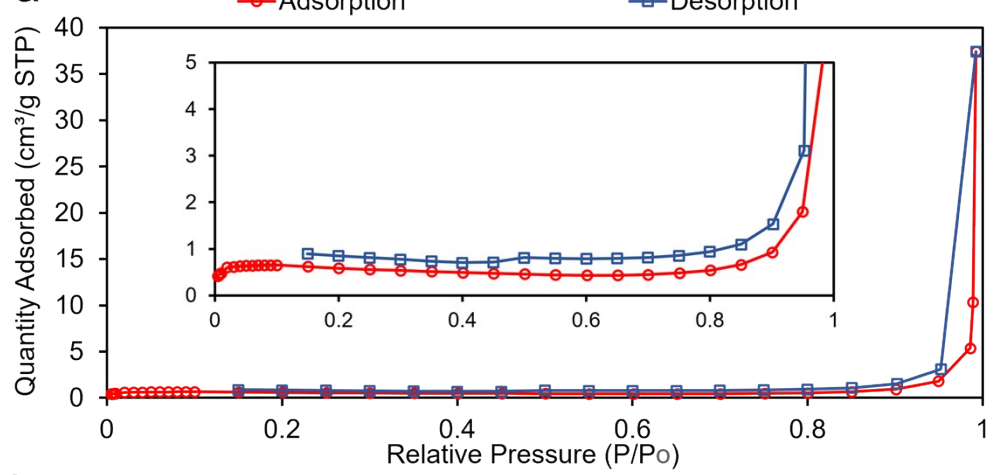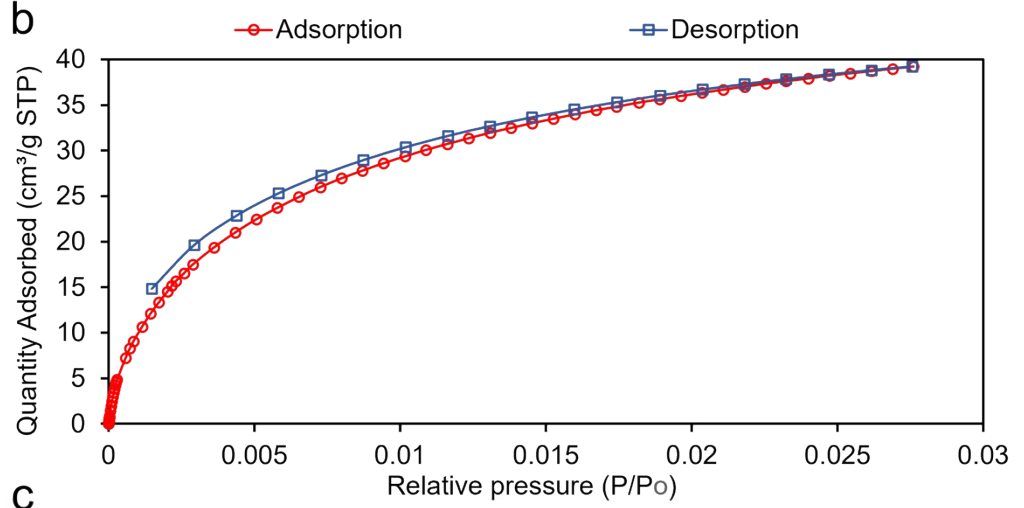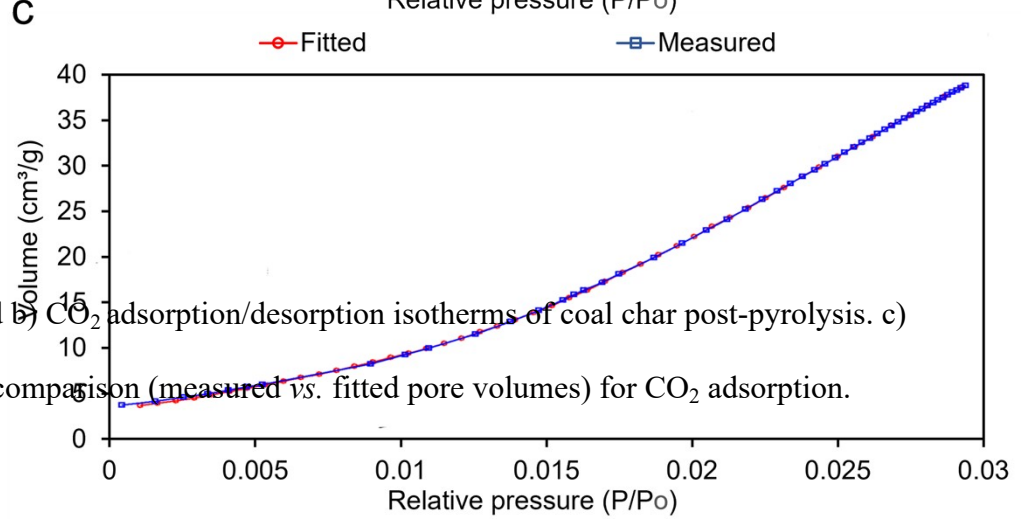

**Figure S1.** a)  $N_2$  and b)  $CO_2$  adsorption/desorption isotherms of coal char post-pyrolysis. c) Monte Carlo fitting comparison (measured vs. fitted pore volumes) for  $CO_2$  adsorption.

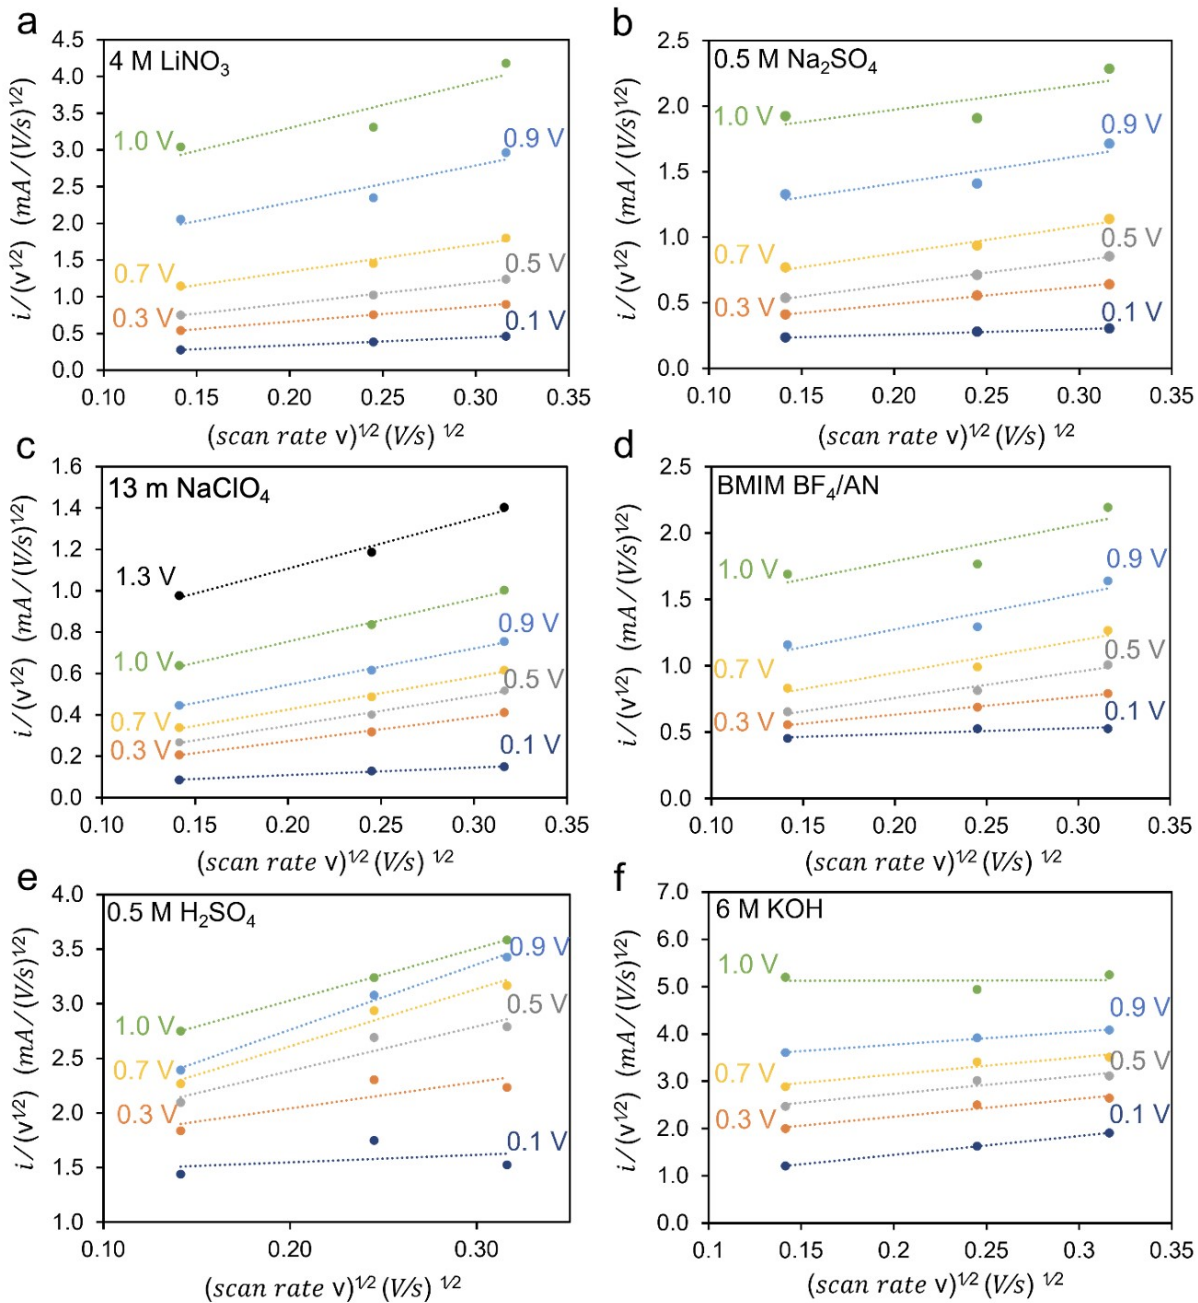

**Figure S2.** Scan rate dependence of two-electrode CV current at varying cell voltages (charging) for: a) 4 M LiNO<sub>3</sub>, b) 0.5 M Na<sub>2</sub>SO<sub>4</sub>, c) 13 m NaClO<sub>4</sub>, d) BMIM BF<sub>4</sub>/AN, e) 0.5 M H<sub>2</sub>SO<sub>4</sub> and f) 6 M KOH electrolytes. Slope and intercept values of the linear fits are used to determine  $k_1$  and  $k_2$  (Figure 6).

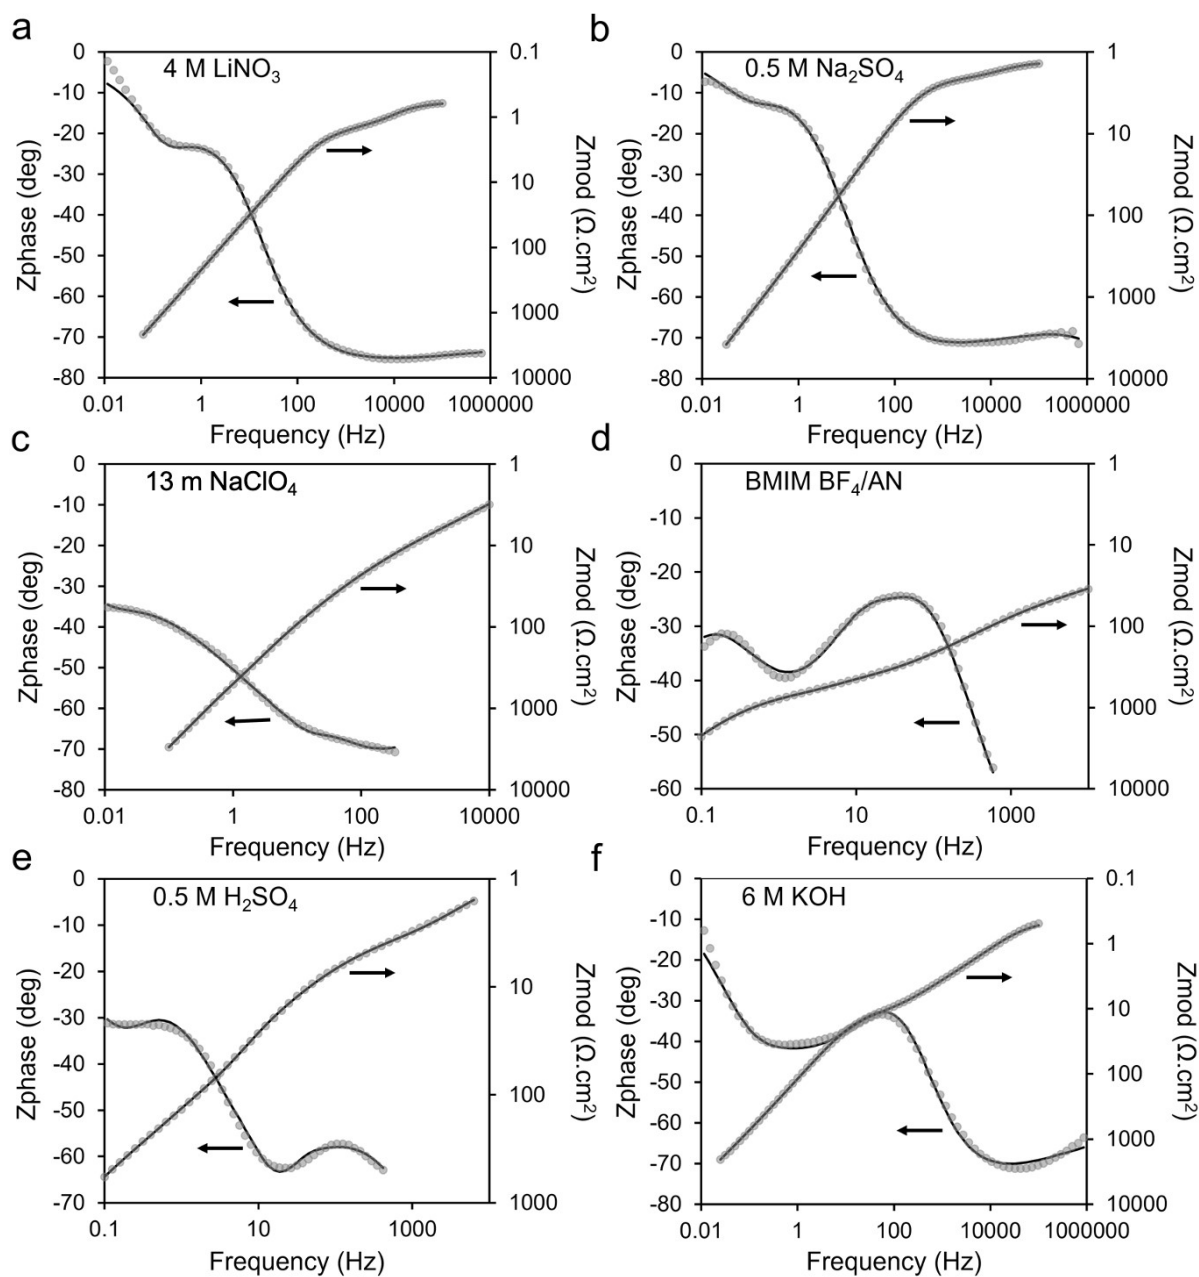

**Figure S3.** Bode plots of EIS measurements for: a) 4 M LiNO<sub>3</sub>, b) 0.5 M Na<sub>2</sub>SO<sub>4</sub>, c) 13 m NaClO<sub>4</sub>, d) BMIM BF<sub>4</sub>/AN, e) 0.5 M H<sub>2</sub>SO<sub>4</sub>, and f) 6 M KOH electrolytes. Grey circles are measured data points; black lines are Randles equivalent circuit model fits.

**Table S5.** Equivalent circuit model Bisquert Open (BTO) parameters used to fit EIS measurements.

| Electrolyte                           | BTO    |                    |                    |                                 |                           |
|---------------------------------------|--------|--------------------|--------------------|---------------------------------|---------------------------|
|                                       | L      | rm<br>( $\Omega$ ) | rk<br>( $\Omega$ ) | Y<br>$S^a/\Omega$ ( $10^{-3}$ ) | $\alpha$<br>( $10^{-3}$ ) |
| 13 m NaClO <sub>4</sub>               | 0.06   | 477.70             | 5.88               | 81.57                           | 703.40                    |
| 6 M KOH                               | 1.80   | 3.33               | 2989.00            | 4.01                            | 872.70                    |
| 0.5 M H <sub>2</sub> SO <sub>4</sub>  | 12.70  | 0.28               | 15.62              | 0.16                            | 760.50                    |
| 4 M LiNO <sub>3</sub>                 | 1.84   | 74.84              | 0.01               | 0.01                            | 944.80                    |
| 0.5 M Na <sub>2</sub> SO <sub>4</sub> | 3.58   | 0.13               | 1446               | 1.12                            | 758.60                    |
| BMIM BF <sub>4</sub> /AN              | 669.70 | 4256.00            | 5.88               | 15.11                           | 934.80                    |

**Table S6.** Equivalent circuit model parameters used to fit EIS measurements.

| Electrolyte                           | R <sub>s</sub><br>( $\Omega$ ) | R <sub>ct</sub><br>( $\Omega$ ) | CPE <sub>1</sub><br>( $S^a/\Omega$ ) ( $10^{-3}$ ) | CPE <sub>2</sub><br>( $S^a/\Omega$ ) ( $10^{-3}$ ) | Goodness of fit<br>( $\chi^2$ )( $10^{-6}$ ) |
|---------------------------------------|--------------------------------|---------------------------------|----------------------------------------------------|----------------------------------------------------|----------------------------------------------|
| 13 m NaClO <sub>4</sub>               | 0.20                           | 44.99                           | 74.62                                              | 0.97                                               | 35.30                                        |
| 6 M KOH                               | 0.21                           | 2.86                            | 1.76                                               | 7.63                                               | 728.10                                       |
| 0.5 M H <sub>2</sub> SO <sub>4</sub>  | 0.21                           | 43.96                           | 5.35                                               | 5.05                                               | 24.11                                        |
| 4 M LiNO <sub>3</sub>                 | 0.31                           | 0.35                            | 0.21                                               | 1.94                                               | 230.60                                       |
| 0.5 M Na <sub>2</sub> SO <sub>4</sub> | 0.67                           | 0.23                            | 0.25                                               | 2.30                                               | 173.80                                       |
| BMIM BF <sub>4</sub> /AN              | 11.70                          | 165.00                          | 0.13                                               | 1.40                                               | 106.70                                       |



## References

1. Madhusree J. E., P. R. Chandewar, D. Shee and S. S. Mal, *J. Electroanal. Chem.*, 2023, **936**, 117354.
2. S. M. Benoy, D. Bhattacharjya, M. Bora and B. K. Saikia, *ACS Appl. Electron. Mater.*, 2022, **4**, 6322-6334.
3. Y. Zou, H. Wang, L. Xu, M. Dong, B. Shen, X. Wang and J. Yang, *J. Power Sources*, 2023, **556**, 232509.
4. S. Yaglikci, Y. Gokce, E. Yagmur, A. Banford and Z. Aktas, *Surf. Interfaces*, 2021, **22**, 100899.
5. M. Bora, S. M. Benoy, J. Tamuly and B. K. Saikia, *J. Environ. Chem. Eng.*, 2021, **9**, 104986.
6. M. Bichat, E. Raymundo-Piñero and F. Béguin, *Carbon*, 2010, **48**, 4351-4361.
7. J. Jiang, B. Liu, G. Liu, D. Qian, C. Yang and J. Li, *Electrochim. Acta*, 2018, **274**, 121-130.
8. X. Bu, L. Su, Q. Dou, S. Lei and X. Yan, *J. Mater. Chem. A*, 2019, **7**, 7541.
9. S. Gharouel and F. Béguin, *Electrochim. Acta*, 2023, **450**, 142212.
10. T. Kim, G. Jung, S. Yoo, K.S. Suh and R. S. Ruoff, *ACS Nano*, 2013, **7**, 6899-6905.
